# Supplementary material for: Selective surface modification in bimodal mesoporous CMK-5 carbon
Source: Royal Society of Chemistry journal article supplement (doi:10.1039/c6ta07772b), 2016-01-01
Supplement: c6ta07772b1.pdf [file c6ta07772b1.pdf]

## Electronic Supplementary Information

### Selective Surface Modification in Bimodal Mesoporous CMK-5 Carbon

Christian Weinberger, Xiaojuan Cao, Michael Tiemann\*

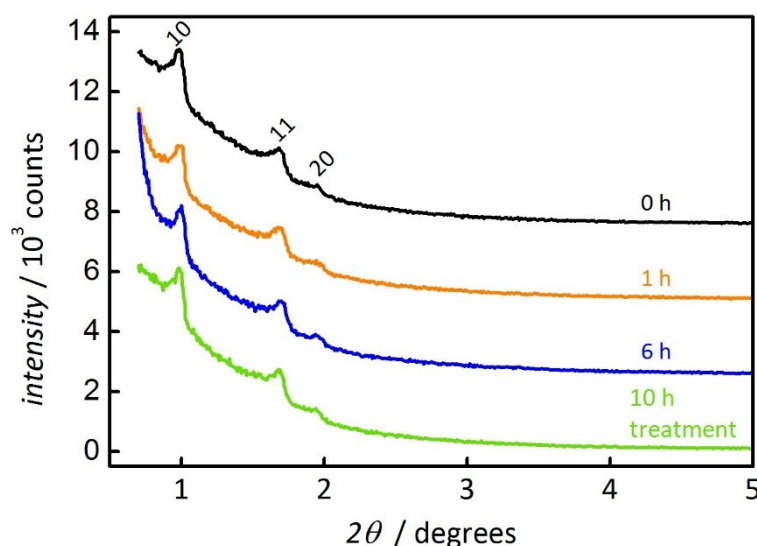

**Figure S1.** Low-angle powder X-ray diffraction patterns (vertically shifted in steps of 2500 counts) of CMK-5 carbon before and after oxidative treatment with persulfate solution up to 10 h.

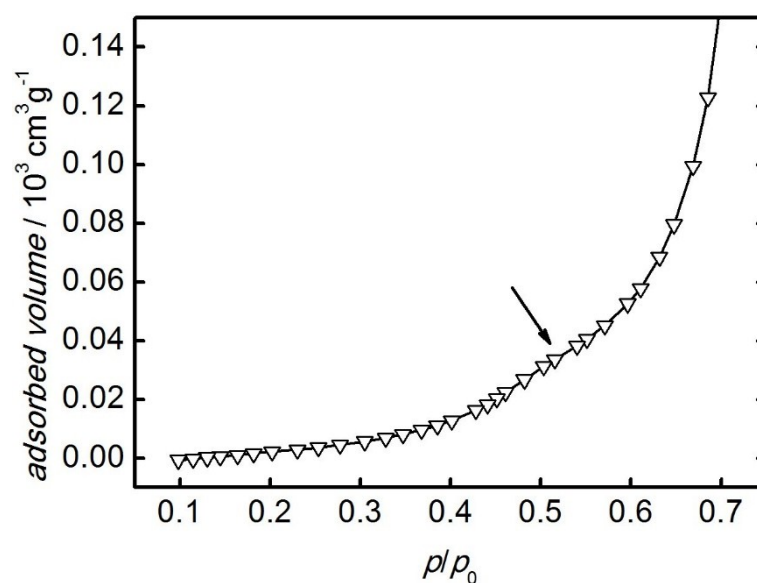

**Figure S2.** Water vapor desorption isotherm of CMK-5 carbon before oxidative treatment with persulfate solution: detail from Figure 2. The step in the isotherm at ca.  $p/p_0 = 0.5$  is visible as a shoulder (arrow); it corresponds to the emptying of the intra-tubular pores, as discussed in the text.

**Table S1.** Pore volume of CMK-5 carbon and CMK-5@SBA-15 composites before and after oxidative treatment with persulfate solution up to 10 h determined from N<sub>2</sub> and H<sub>2</sub>O physisorption.

| sample                     | treatment | $A_{\text{BET}}^{[a]}$<br>m <sup>2</sup> g <sup>-1</sup> | $V_{\text{N}_2}^{[b]}$<br>cm <sup>3</sup> g <sup>-1</sup> | $V_{\text{H}_2\text{O}}^{[c]}$<br>cm <sup>3</sup> g <sup>-1</sup> | $V_{\text{N}_2} / V_{\text{H}_2\text{O}}$ |
|----------------------------|-----------|----------------------------------------------------------|-----------------------------------------------------------|-------------------------------------------------------------------|-------------------------------------------|
| CMK-5 carbon               | (none)    | 1084                                                     | 1.55                                                      | 0.93                                                              | 0.60                                      |
|                            | 1 h       | 1057                                                     | 1.49                                                      | 1.08                                                              | 0.72                                      |
|                            | 6 h       | 1027                                                     | 1.43                                                      | 1.08                                                              | 0.76                                      |
|                            | 10 h      | 1031                                                     | 1.43                                                      | 1.07                                                              | 0.75                                      |
| CMK-5 @SBA-15<br>composite | (none)    | 273                                                      | 0.33                                                      | 0.21                                                              | 0.64                                      |
|                            | 1 h       | 212                                                      | 0.27                                                      | 0.24                                                              | 0.89                                      |
|                            | 6 h       | 166                                                      | 0.24                                                      | 0.23                                                              | 0.96                                      |
|                            | 10 h      | 160                                                      | 0.24                                                      | 0.24                                                              | 1.00                                      |

<sup>[a]</sup> specific surface area; <sup>[b]</sup> specific pore volume from N<sub>2</sub> physisorption; <sup>[c]</sup> specific pore volume from H<sub>2</sub>O physisorption
